# Supplementary material for: Benchmarking and optimisation of bait-capture metagenomics for sequencing of respiratory viruses at scale
Source: Research Square preprint supplement (doi:10.21203/rs.3.rs-7872581/v1), 2025-11-07
Supplement: Supplementary file 1 [file 4e4e64df2c81bba90b951a36.pdf]

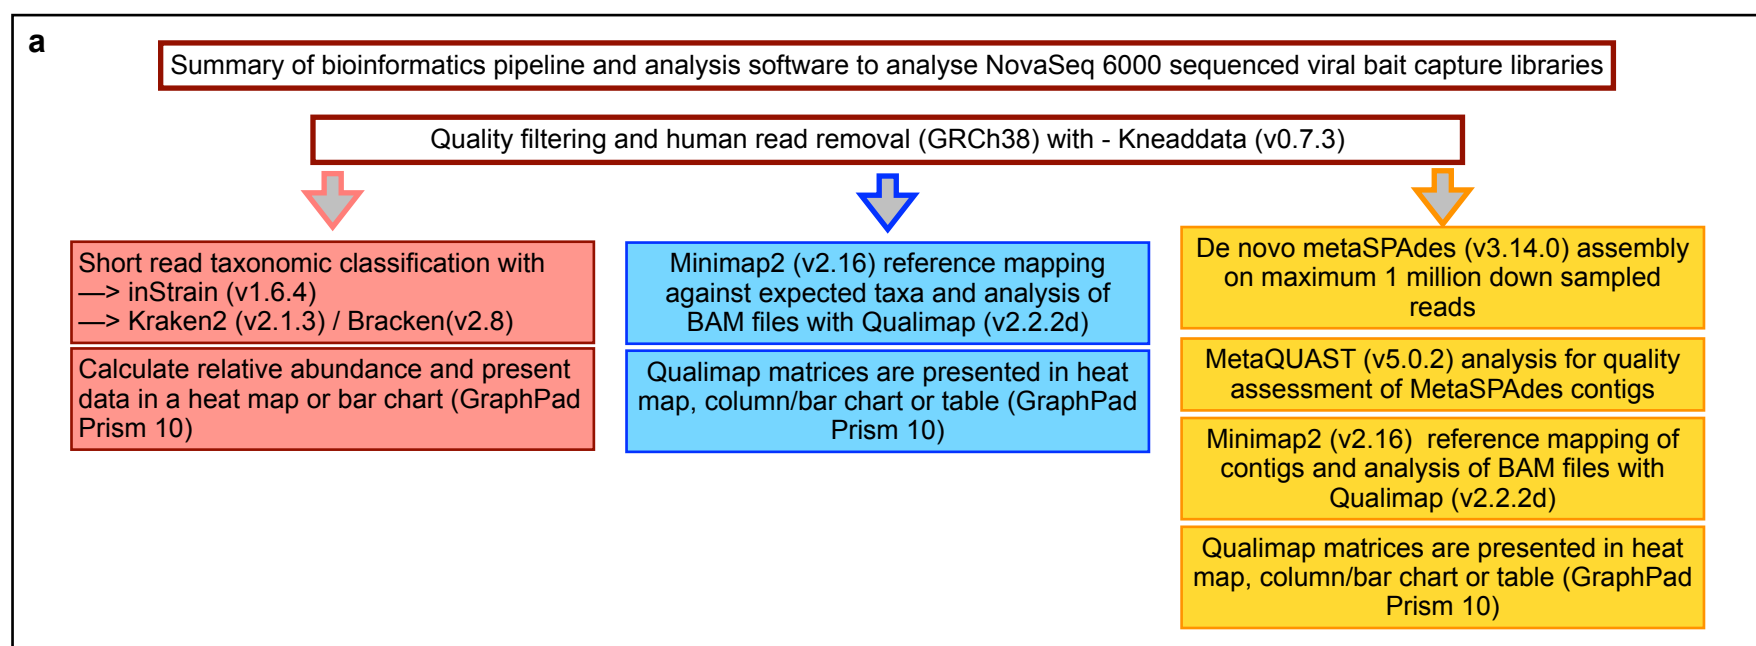

**b**

|                                               | Pilot 1 - initial test of three viral BCM                           | Pilot 2 - Expanding number of samples and include Illumina 8-plex                            | Pilot 3 - continue with RVI-seq method and test laboratory cost savings                                                                                                     | Production plate 1 RVI-seq and standard SPRI                                                        | Production plate 2 RVI-seq and standard SPRI                                                        |
|-----------------------------------------------|---------------------------------------------------------------------|----------------------------------------------------------------------------------------------|-----------------------------------------------------------------------------------------------------------------------------------------------------------------------------|-----------------------------------------------------------------------------------------------------|-----------------------------------------------------------------------------------------------------|
| Number of clinical and synthetic samples used | veSEQ 8-plex (n32)<br>RVI-seq 8-plex (n32)<br>Illumina 3-plex (n32) | veSEQ 8-plex (n96)<br>RVI-seq 8-plex (n96)<br>Illumina 3-plex (n96)<br>Illumina 8-plex (n96) | 1X cDNA synthesis, standard SPRI (n48)<br>1.6X cDNA synthesis, standard SPRI (n48)<br>1.X cDNA synthesis, stringent SPRI (n48)<br>1.6X cDNA synthesis, stringent SPRI (n48) | Repeat of Pilot 3 samples (n48) for reproducibility testing, plus additional clinical samples (n48) | Repeat of Pilot 3 samples (n48) for reproducibility testing, plus additional clinical samples (n48) |
| Clinical SARS-CoV-2 positive                  | 8                                                                   | 22                                                                                           | 16                                                                                                                                                                          | 16                                                                                                  | 16                                                                                                  |
| Clinical SARS-CoV-2 negative                  | 8                                                                   | 16                                                                                           | 2                                                                                                                                                                           | 2                                                                                                   | 2                                                                                                   |
| Twist HCoV (NL63+OC43+229E)                   | 4                                                                   | 4                                                                                            | 4                                                                                                                                                                           | 4                                                                                                   | 4                                                                                                   |
| Twist H3N2                                    | 5                                                                   | 5                                                                                            | 5                                                                                                                                                                           | 5                                                                                                   | 5                                                                                                   |
| Twist H1N1 + hPIV1 + SC2                      | 6                                                                   | 6                                                                                            | 6                                                                                                                                                                           | 6                                                                                                   | 6                                                                                                   |
| Water negative                                | 1                                                                   | 1                                                                                            | 1                                                                                                                                                                           | 1                                                                                                   | 1                                                                                                   |
| Twist SC2 + clinical SC2 positive (Omicron)   |                                                                     | 1                                                                                            |                                                                                                                                                                             |                                                                                                     |                                                                                                     |
| NIBSC H3N2 + hPIV1                            |                                                                     | 7                                                                                            |                                                                                                                                                                             |                                                                                                     |                                                                                                     |
| NIBSC H1N1 + Rhinovirus                       |                                                                     | 7                                                                                            |                                                                                                                                                                             |                                                                                                     |                                                                                                     |
| NIBSC Flu B                                   |                                                                     | 5                                                                                            |                                                                                                                                                                             |                                                                                                     |                                                                                                     |
| NIBSC RSV B                                   |                                                                     | 6                                                                                            |                                                                                                                                                                             |                                                                                                     |                                                                                                     |
| NIBSC human Metapneumovirus                   |                                                                     | 1                                                                                            |                                                                                                                                                                             |                                                                                                     |                                                                                                     |
| NIBSC human                                   |                                                                     | 1                                                                                            |                                                                                                                                                                             |                                                                                                     |                                                                                                     |
| NIBSC multi plex Flu+RSV+SARS-CoV-2           |                                                                     | 1                                                                                            |                                                                                                                                                                             |                                                                                                     |                                                                                                     |
| Nasal swap negative                           |                                                                     | 5                                                                                            |                                                                                                                                                                             |                                                                                                     |                                                                                                     |
| Nasal swap negative + viral spike in          |                                                                     | 5                                                                                            |                                                                                                                                                                             |                                                                                                     |                                                                                                     |
| ZeptoMetrix controls                          |                                                                     | 2                                                                                            | 2                                                                                                                                                                           | 2                                                                                                   | 2                                                                                                   |
| Extraction control                            |                                                                     | 1                                                                                            |                                                                                                                                                                             |                                                                                                     |                                                                                                     |
| Twist SARS-CoV-2                              |                                                                     |                                                                                              | 7                                                                                                                                                                           | 7                                                                                                   | 7                                                                                                   |
| NIBSC Commercial RSV A                        |                                                                     |                                                                                              | 5                                                                                                                                                                           | 5                                                                                                   | 5                                                                                                   |
| NIBSC Commercial RSV B                        |                                                                     |                                                                                              |                                                                                                                                                                             | 4                                                                                                   | 4                                                                                                   |
| Clinical Flu B                                |                                                                     |                                                                                              |                                                                                                                                                                             | 4                                                                                                   | 2                                                                                                   |
| Clinical Flu A                                |                                                                     |                                                                                              |                                                                                                                                                                             | 23                                                                                                  | 9                                                                                                   |
| Clinical hPIV 2,3,4                           |                                                                     |                                                                                              |                                                                                                                                                                             | 7                                                                                                   | 16                                                                                                  |
| Clinical RSV A + B                            |                                                                     |                                                                                              |                                                                                                                                                                             | 8 + 1                                                                                               |                                                                                                     |
| Clinical HCoV                                 |                                                                     |                                                                                              |                                                                                                                                                                             |                                                                                                     | 13                                                                                                  |
| Clinical Adenovirus + Extraction Controls     |                                                                     |                                                                                              |                                                                                                                                                                             |                                                                                                     | 3 + 1                                                                                               |

**Figure S1 - Flowchart outlining bioinformatics pipeline and samples used for validating three viral bait capture methods (BCM).**

**a.** The bioinformatics pipeline includes programs for short read taxonomic classification, reference mapping, de novo assembly, BAM file and contigs analysis tools. **b.** Samples include clinical samples of SARS-CoV-2 (SC2), influenza A (H1N1 and H3N2), influenza B, human parainfluenza viruses (hPIV 2, 3, and 4), respiratory syncytial viruses (RSV A and B), non-SARS human coronaviruses (hCoV), and adenovirus. Additionally, synthetic RNA from Twist and reference RNA from the National Institute for Biological Standards and Control (NIBSC), as well as samples from ZeptoMetrix NATtrol™ Respiratory Panel 2.1 (RP2.1) controls, were included. Abbreviations: SPRI = Solid-Phase Reversible Immobilisation.
