# Supplementary material for: Benchmarking and optimisation of bait-capture metagenomics for sequencing of respiratory viruses at scale
Source: Research Square preprint supplement (doi:10.21203/rs.3.rs-7872581/v1), 2025-11-07
Supplement: Supplementary file 2 [file 84c8436375447a2f35b933ea.pdf]

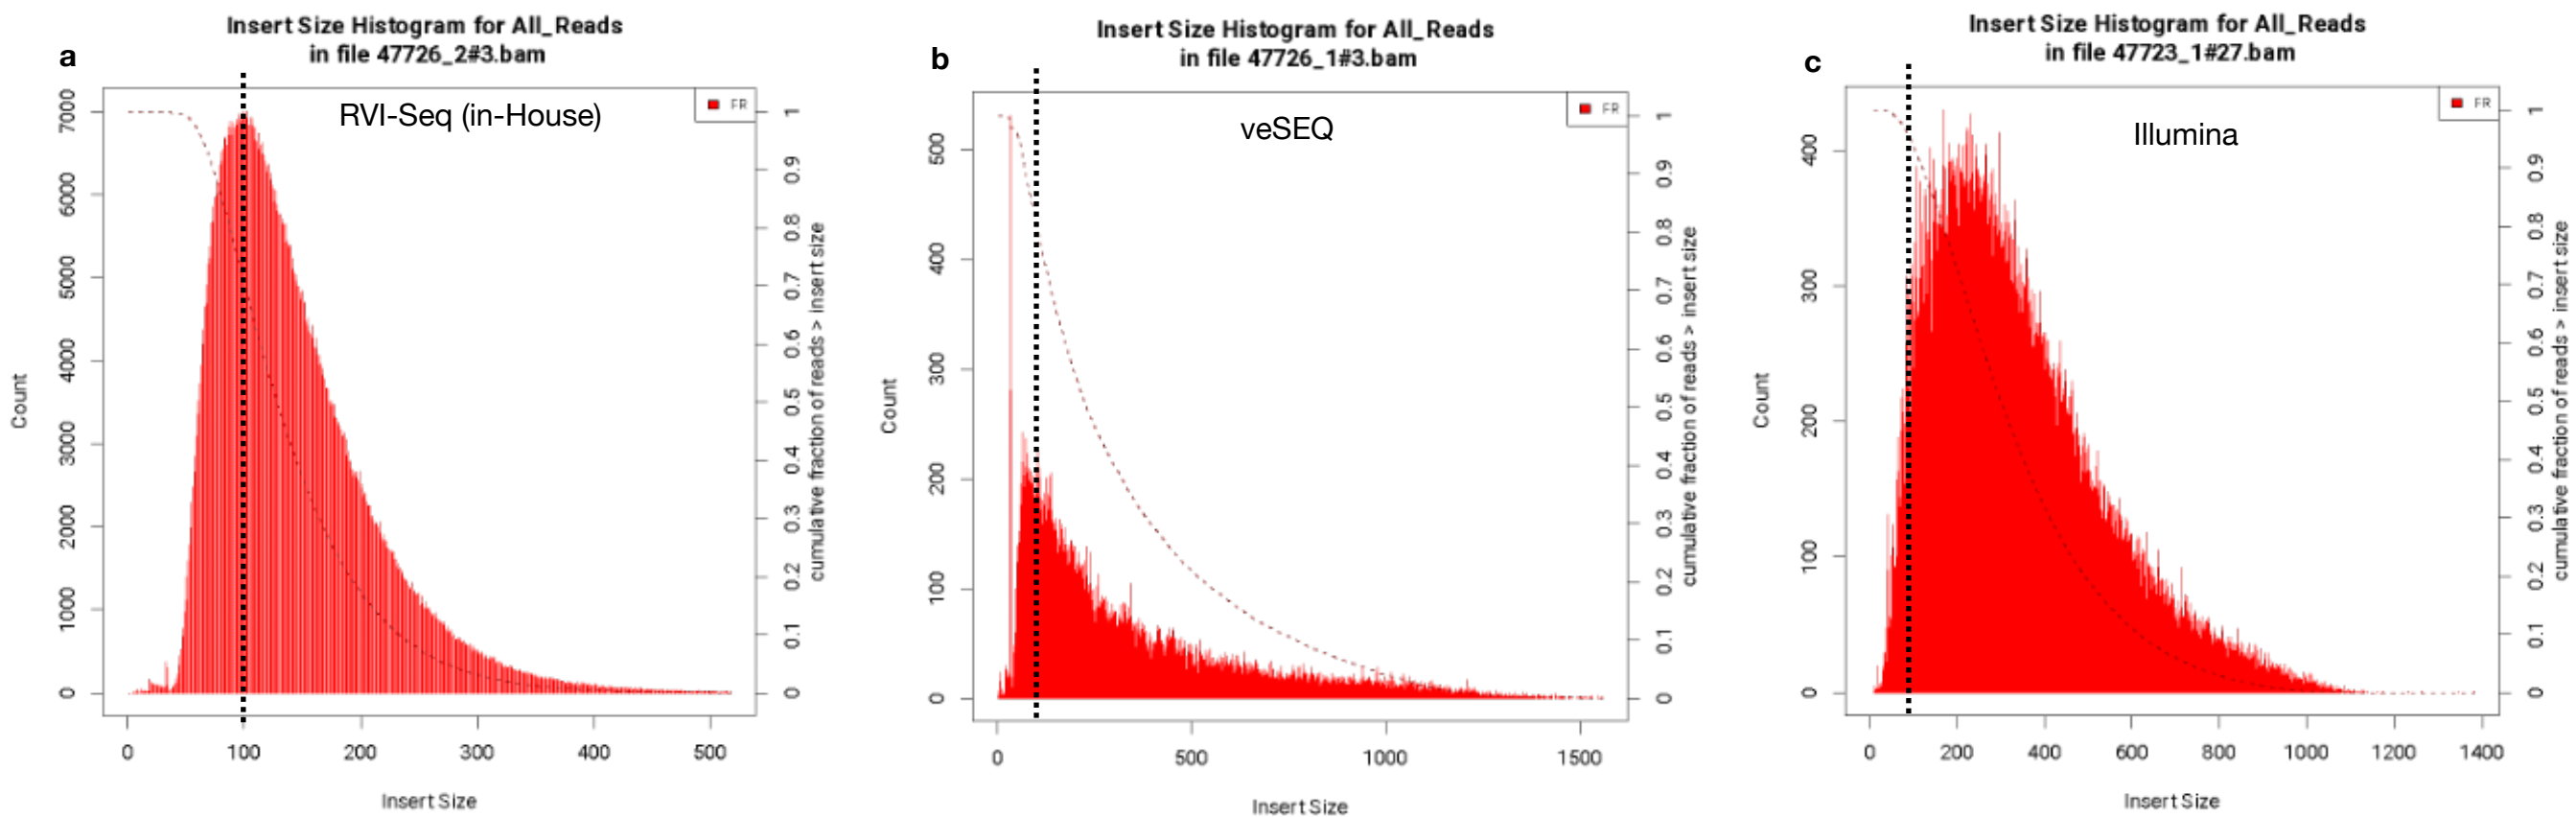

**Figure S5 - Insert size distribution is smallest in the RVI-seq bait capture method**

The insert size distribution for a Twist synthetic SARS-CoV-2 sample (100k copies) is shown, from which the largest proportion of reads below 100bp length were removed by Kneaddata filtering from the inHouse method (a), compared to the Ampheus method (b) and the Illumina method (c).
