# Supplementary material for: Benchmarking and optimisation of bait-capture metagenomics for sequencing of respiratory viruses at scale
Source: Research Square preprint supplement (doi:10.21203/rs.3.rs-7872581/v1), 2025-11-07
Supplement: Supplementary file 3 [file 88374ff1eed8fe49e4ec013f.pdf]

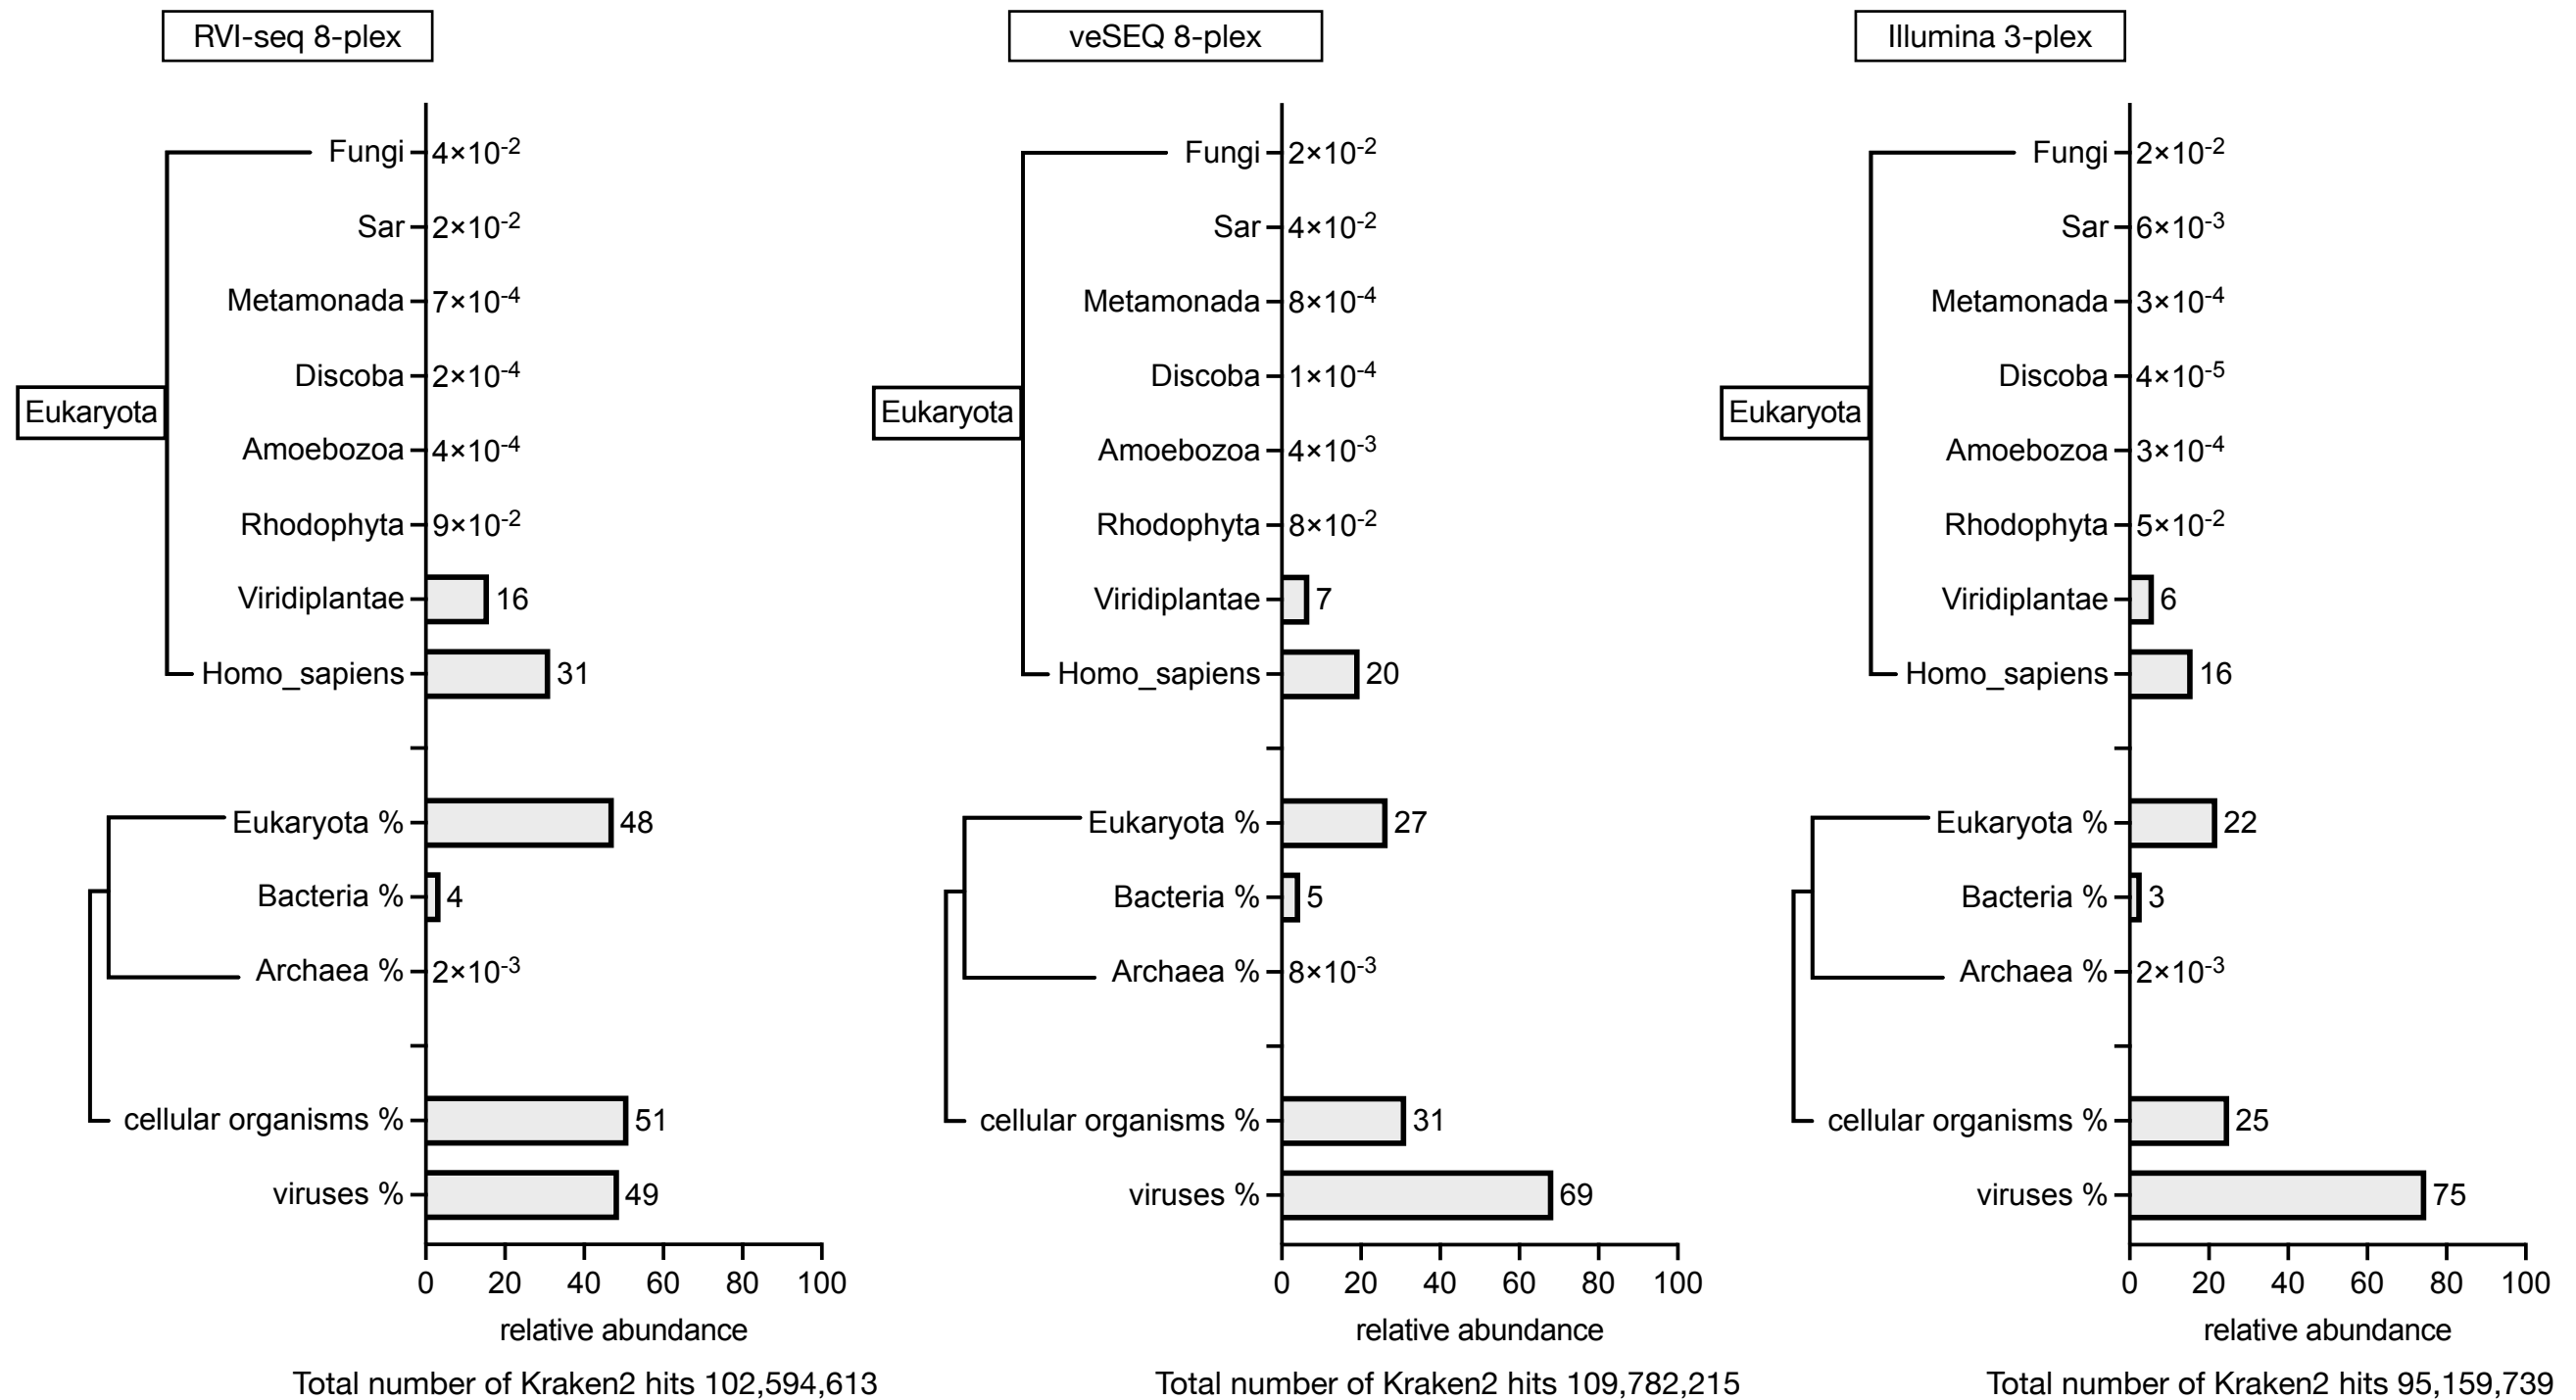

**Figure S3 - Higher classification differences detected between the three different bait capture methods in pilot 1 study**

The Kraken PlusPFP database (standard plus Refseq protozoa, fungi & plant 3/14/2023) was used to classify the RVI pilot 1 study (1st run) at the highest taxonomic level. The relative abundances are shown for viruses and cellular organisms as a bar chart. The cellular organisms were then further classified into eukaryotes, bacteria and archaea. Finally, the eukaryotes were further subdivided into *Homo sapiens* and others. The relative proportion of taxa composition was calculated from the total number of Kraken2 hits using Microsoft Excel for Mac (v 16.72). The plot was generated in Prism 9 for MacOS (v 9.5.1) and finalised in MAC Keynote (v 13.0)
