# Supplementary material for: Benchmarking and optimisation of bait-capture metagenomics for sequencing of respiratory viruses at scale
Source: Research Square preprint supplement (doi:10.21203/rs.3.rs-7872581/v1), 2025-11-07
Supplement: Supplementary file 7 [file Supplementary Result Figure 4 --- inStrain method validation.pdf › Additional File 7 Supplementary Results/Supplementary Result Figure 4 --- inStrain method validation.pdf]

## ZeptoMetrix taxa

|                    |
|--------------------|
| Adenovirus Type 1  |
| Adenovirus Type 3  |
| Adenovirus Type 31 |

|                                                     |
|-----------------------------------------------------|
| Influenza A<br>H1N1<br>pandemic<br>A/NY/<br>02/2009 |
|-----------------------------------------------------|

Influenza A  
H3N2 A/  
Brisbane/  
10/07

Metapneumonia virus 8

### Parainfluenza Type 1

### Parainfluenza Type 4

Rhinovirus 1A

Influenza A  
H1N1 A/  
New  
Caledonia /  
20/1999

Coronavirus 229E

Coronavirus HKU1

CoronavirusNL43

Coronavirus OC43

Influenza B  
B/Florida  
02/06

### Parainfluenza Type 3

**Discussion**

type 2  
BOM

|                             | inStrain option1             |        |        |        |                              |        |        |        | inStrain option2             |        |        |        |                              |        |        |        | inStrain option3             |        |        |        |                              |        |        |        |       |
|-----------------------------|------------------------------|--------|--------|--------|------------------------------|--------|--------|--------|------------------------------|--------|--------|--------|------------------------------|--------|--------|--------|------------------------------|--------|--------|--------|------------------------------|--------|--------|--------|-------|
|                             | RVI-                         |        |        |        | RVI-                         |        |        |        | RVI-                         |        |        |        | RVI-                         |        |        |        | RVI-                         |        |        |        |                              |        |        |        |       |
|                             | veSEQ                        | seq    | ll 3pl | ll 8pl | veSEQ                        | seq    | ll 3pl | ll 8pl | veSEQ                        | seq    | ll 3pl | ll 8pl | veSEQ                        | seq    | ll 3pl | ll 8pl | veSEQ                        | seq    | ll 3pl | ll 8pl |                              |        |        |        |       |
| Human adenovirus 1          | 0.312                        | 0.076  | 1.572  | 1.478  |                              |        |        |        | 0.311                        | 0.076  | 1.570  | 1.476  |                              |        |        | 0.001  | 0.333                        | 0.078  | 1.592  | 1.495  |                              |        |        |        | 0.001 |
| Human adenovirus 2          |                              |        | 0.089  | 0.085  |                              |        |        |        | 0.015                        | 0.005  | 0.089  | 0.085  |                              |        |        |        | 0.016                        | 0.005  | 0.090  | 0.085  |                              |        |        |        |       |
| Human adenovirus 5          |                              |        | 0.081  | 0.072  |                              |        |        |        | 0.012                        | 0.003  | 0.081  | 0.072  |                              |        |        |        | 0.013                        | 0.003  | 0.083  | 0.073  |                              |        |        |        |       |
| Human adenovirus 7          | 24.587                       | 23.797 | 23.564 | 23.153 |                              |        |        |        | 24.527                       | 23.755 | 23.541 | 23.139 |                              | 0.001  | 0.001  | 0.001  | 25.082                       | 23.910 | 23.584 | 23.173 |                              | 0.002  | 0.002  | 0.002  |       |
| Human adenovirus A          |                              |        |        |        |                              |        |        |        | 0.021                        | 0.002  | 0.001  | 0.001  |                              |        |        |        | 0.004                        | 0.002  |        |        |                              |        |        |        |       |
| Human mastadenovirus A      |                              |        |        |        |                              |        |        |        | 0.017                        | 0.003  |        | 0.001  |                              |        |        |        | 0.004                        | 0.002  |        | 0.001  |                              |        |        |        |       |
| Human adenovirus B1         | 71.165                       | 68.576 | 71.705 | 72.122 |                              |        |        |        | 71.073                       | 68.528 | 71.645 | 72.095 |                              | 0.001  | 0.003  | 0.006  | 70.531                       | 68.604 | 71.638 | 72.103 |                              | 0.002  | 0.004  | 0.008  |       |
| Human adenovirus B2         |                              | 0.111  |        | 0.046  |                              |        |        |        | 0.008                        | 0.114  | 0.038  | 0.045  |                              |        |        |        | 0.001                        | 0.087  | 0.036  | 0.043  |                              |        |        |        |       |
| Human adenovirus C          |                              |        | 0.091  | 0.091  |                              |        |        |        | 0.010                        | 0.005  | 0.090  | 0.091  |                              |        |        |        | 0.011                        | 0.005  | 0.092  | 0.092  |                              |        |        |        |       |
| Human adenovirus E          |                              |        |        |        |                              |        |        |        |                              |        | 0.001  |        |                              |        |        |        |                              |        |        |        |                              |        |        |        |       |
| Human adenovirus type 35    |                              | 0.070  |        |        |                              |        |        |        | 0.025                        | 0.078  | 0.022  | 0.020  |                              |        |        |        | 0.001                        | 0.022  | 0.011  | 0.011  |                              |        |        |        |       |
| FLU A (H1N1 CAL) sgm 1      | 0.422                        | 0.936  | 0.355  | 0.375  | 0.018                        | 0.010  | 0.006  |        | 0.420                        | 0.936  | 0.355  | 0.374  | 0.015                        | 0.019  | 0.009  | 0.006  | 0.453                        | 0.945  | 0.357  | 0.374  |                              | 0.014  | 0.010  | 0.007  |       |
| FLU A (H1N1 CAL) sgm 2      | 0.446                        | 1.333  | 0.385  | 0.422  |                              |        |        |        | 0.443                        | 1.338  | 0.385  | 0.422  |                              |        |        |        | 0.477                        | 1.352  | 0.386  | 0.421  |                              |        |        |        |       |
| FLU A (H1N1 CAL) sgm 3      | 0.464                        | 0.882  | 0.242  | 0.266  |                              |        |        |        | 0.461                        | 0.884  | 0.242  | 0.266  |                              |        |        |        | 0.489                        | 0.891  | 0.242  | 0.265  |                              |        |        |        |       |
| FLU A (H1N1 CAL) sgm 4      | 0.376                        | 0.745  | 0.291  | 0.284  |                              |        |        |        | 0.376                        | 0.752  | 0.290  | 0.284  |                              |        |        |        | 0.397                        | 0.741  | 0.289  | 0.283  |                              |        |        |        |       |
| FLU A (H1N1 CAL) sgm 5      | 0.313                        | 0.646  | 0.315  | 0.325  |                              |        |        |        | 0.312                        | 0.649  | 0.317  | 0.327  |                              |        |        |        | 0.337                        | 0.650  | 0.312  | 0.323  |                              |        |        |        |       |
| FLU A (H1N1 CAL) sgm 6      | 0.212                        | 0.538  | 0.201  | 0.207  |                              |        |        |        | 0.211                        | 0.542  | 0.201  | 0.208  |                              |        |        |        | 0.221                        | 0.532  | 0.202  | 0.207  |                              |        |        |        |       |
| FLU A (H1N1 CAL) sgm 7      | 0.294                        | 0.479  | 0.209  | 0.197  |                              |        |        |        | 0.293                        | 0.483  | 0.208  | 0.197  |                              |        |        |        | 0.314                        | 0.479  | 0.210  | 0.196  |                              |        |        |        |       |
| FLU A (H1N1 CAL) sgm 8      | 0.175                        | 0.354  | 0.106  | 0.113  |                              |        |        |        | 0.187                        | 0.357  | 0.106  | 0.113  |                              |        |        |        | 0.170                        | 0.342  | 0.105  | 0.113  |                              |        |        |        |       |
| FLU A (H3N2 NY) sgm 1       |                              |        |        |        |                              |        |        |        |                              |        |        |        | 0.015                        | 0.009  | 0.002  | 0.001  |                              |        |        |        | 0.002                        | 0.001  |        |        |       |
| FLU A (H3N2 NY) sgm 2       | 0.010                        | 0.011  |        |        |                              |        |        |        | 0.011                        | 0.012  | 0.001  |        |                              |        |        |        | 0.007                        | 0.008  | 0.001  |        |                              |        |        |        |       |
| FLU A (H3N2 NY) sgm 3       |                              |        |        |        |                              |        |        |        |                              |        |        |        | 0.008                        | 0.001  |        | 0.001  |                              |        |        |        |                              |        |        |        |       |
| FLU A (H3N2 NY) sgm 4       | 0.092                        | 0.140  | 0.060  | 0.061  |                              |        |        |        | 0.091                        | 0.142  | 0.060  | 0.061  |                              |        |        |        | 0.095                        | 0.124  | 0.056  | 0.059  |                              |        |        |        |       |
| FLU A (H3N2 NY) sgm 5       |                              |        |        |        |                              |        |        |        |                              |        |        |        |                              |        | 0.001  |        |                              |        |        |        |                              |        |        |        |       |
| FLU A (H3N2 NY) sgm 6       | 0.036                        | 0.067  | 0.038  | 0.036  |                              |        |        |        | 0.040                        | 0.069  | 0.037  | 0.036  |                              |        |        |        | 0.037                        | 0.062  | 0.036  | 0.035  |                              |        |        |        |       |
| FLU A (H3N2 NY) sgm 7       |                              |        |        |        |                              |        |        |        |                              |        |        |        | 0.030                        | 0.008  | 0.002  | 0.002  |                              |        |        |        |                              |        |        |        |       |
| FLU A (H3N2 NY) sgm 8       |                              |        |        |        |                              |        | 0.004  |        |                              |        |        |        |                              |        |        | 0.004  |                              |        |        |        |                              |        |        |        | 0.005 |
| Human metapneumovirus       |                              |        |        |        |                              |        |        |        | 0.004                        |        |        |        |                              |        |        |        |                              |        |        |        |                              |        |        |        |       |
| Human parainfluenza 1       | 0.062                        | 0.159  | 0.070  | 0.073  |                              |        |        |        | 0.063                        | 0.160  | 0.071  | 0.073  |                              |        |        |        | 0.055                        | 0.147  | 0.067  | 0.069  |                              |        |        |        |       |
| Human parainfluenza 4a      | 0.069                        | 0.320  | 0.128  | 0.124  |                              |        |        |        | 0.072                        | 0.333  | 0.128  | 0.125  |                              |        |        |        | 0.058                        | 0.264  | 0.115  | 0.110  |                              |        |        |        |       |
| Human rhinovirus 1          | 0.117                        | 0.098  |        |        |                              |        |        |        | 0.116                        | 0.098  | 0.002  | 0.002  |                              |        |        |        |                              |        |        |        |                              |        |        |        |       |
| SARS-Cov2                   | 0.044                        | 0.115  | 0.103  | 0.054  |                              |        |        |        | 0.044                        | 0.115  | 0.103  | 0.054  |                              |        | 0.001  |        | 0.046                        | 0.115  | 0.103  | 0.054  |                              |        |        | 0.001  |       |
| FLU A (H1N1 PRI) sgm 1      | 0.296                        | 0.137  | 0.082  | 0.078  | 2.627                        | 0.216  | 0.079  | 0.098  | 0.327                        | 0.141  | 0.083  | 0.078  | 2.445                        | 0.258  | 0.100  | 0.116  | 0.284                        | 0.127  | 0.080  | 0.077  | 0.120                        | 0.062  | 0.011  | 0.013  |       |
| FLU A (H1N1 PRI) sgm 2      | 0.069                        | 0.056  | 0.121  | 0.150  | 0.106                        | 0.029  | 0.089  | 0.090  | 0.079                        | 0.056  | 0.121  | 0.151  | 0.218                        | 0.030  | 0.118  | 0.116  | 0.049                        | 0.055  | 0.114  | 0.144  |                              | 0.008  | 0.004  | 0.007  |       |
| FLU A (H1N1 PRI) sgm 3      | 0.077                        | 0.093  | 0.089  | 0.074  | 0.239                        | 0.160  | 0.039  | 0.046  | 0.076                        | 0.093  | 0.089  | 0.074  | 0.248                        | 0.169  | 0.042  | 0.046  | 0.080                        | 0.091  | 0.087  | 0.072  | 0.024                        | 0.095  | 0.020  | 0.030  |       |
| FLU A (H1N1 PRI) sgm 4      |                              |        |        |        |                              |        | 0.033  | 0.035  |                              |        |        |        | 0.008                        | 0.010  | 0.055  | 0.060  |                              |        |        |        |                              |        |        | 0.003  |       |
| FLU A (H1N1 PRI) sgm 5      | 0.095                        | 0.081  | 0.064  | 0.075  | 0.327                        | 0.152  | 0.017  | 0.028  | 0.097                        | 0.080  | 0.064  | 0.075  | 0.376                        | 0.142  | 0.018  | 0.027  | 0.097                        | 0.082  | 0.063  | 0.075  | 0.168                        | 0.123  | 0.011  | 0.008  |       |
| FLU A (H1N1 PRI) sgm 6      |                              |        |        |        |                              |        |        |        |                              |        |        |        |                              | 0.002  | 0.019  | 0.015  |                              |        |        |        |                              |        |        |        |       |
| FLU A (H1N1 PRI) sgm 7      | 0.127                        | 0.122  | 0.020  | 0.021  | 1.901                        | 0.328  | 0.095  | 0.087  | 0.126                        | 0.123  | 0.019  | 0.021  | 1.753                        | 0.351  | 0.098  | 0.096  | 0.137                        | 0.122  | 0.020  | 0.021  | 2.004                        | 0.299  | 0.097  | 0.087  |       |
| FLU A (H1N1 PRI) sgm 8      | 0.035                        | 0.039  | 0.016  | 0.010  | 0.071                        | 0.092  | 0.008  | 0.010  | 0.038                        | 0.039  | 0.016  | 0.010  | 0.098                        | 0.103  | 0.010  | 0.012  | 0.037                        | 0.039  | 0.015  | 0.010  |                              | 0.014  | 0.002  | 0.002  |       |
| Human orthopneumovirus A    |                              |        |        |        |                              |        |        |        |                              |        |        |        |                              | 0.013  | 0.006  | 0.007  |                              |        |        |        |                              | 0.018  | 0.008  | 0.009  |       |
| Human coronavirus 229E      |                              |        | 24.250 | 39.976 | 44.253                       | 43.445 |        |        |                              |        |        |        | 20.632                       | 36.534 | 40.995 | 39.913 |                              |        |        |        | 32.613                       | 49.613 | 51.458 | 50.988 |       |
| Human coronavirus HKU1      |                              |        |        |        |                              |        |        |        |                              |        |        |        |                              | 0.012  | 0.005  | 0.006  |                              |        |        |        |                              | 0.014  | 0.005  | 0.006  |       |
| Human Coronavirus NL63      |                              |        | 1.840  | 3.525  | 3.366                        | 3.361  |        |        |                              |        |        |        | 1.565                        | 3.214  | 3.111  | 3.085  |                              |        |        |        | 2.460                        | 4.383  | 3.886  | 3.911  |       |
| Human coronavirus OC43      |                              |        | 9.047  | 8.833  | 11.176                       | 11.022 |        |        |                              |        |        |        | 7.698                        | 8.087  | 10.348 | 10.136 |                              |        |        |        | 12.239                       | 10.905 | 12.939 | 12.858 |       |
| FLU B sgm 1                 |                              |        | 1.760  | 4.028  | 2.832                        | 2.952  |        |        |                              |        |        |        | 4.560                        | 5.066  | 3.844  | 4.001  |                              |        |        |        |                              | 0.327  | 0.125  | 0.118  |       |
| FLU B sgm 2                 |                              |        | 3.290  | 3.445  | 2.803                        | 2.959  |        |        |                              |        |        |        | 5.455                        | 5.192  | 4.522  | 4.828  |                              |        |        |        |                              | 0.465  | 0.199  | 0.195  |       |
| FLU B sgm 3                 |                              |        | 4.652  | 3.432  | 2.050                        | 2.161  |        |        |                              |        |        |        | 6.825                        | 4.949  | 3.179  | 3.490  |                              |        |        |        | 0.468                        | 0.636  | 0.173  | 0.148  |       |
| FLU B sgm 4                 |                              |        | 0.769  | 2.012  | 1.331                        | 1.400  |        |        |                              |        |        |        | 1.535                        | 2.430  | 1.730  | 1.841  |                              |        |        |        | 0.348                        | 1.158  | 0.667  | 0.660  |       |
| FLU B sgm 5                 |                              |        | 1.946  | 3.350  | 2.498                        | 2.558  |        |        |                              |        |        |        | 3.567                        | 3.898  | 3.197  | 3.261  |                              |        |        |        |                              | 0.296  | 0.163  | 0.155  |       |
| FLU B sgm 6                 |                              |        | 0.398  | 1.119  | 0.816                        | 0.843  |        |        |                              |        |        |        | 0.873                        | 1.769  | 1.456  | 1.578  |                              |        |        |        |                              | 0.063  | 0.015  | 0.015  |       |
| FLU B sgm 7                 |                              |        | 1.672  | 1.543  | 1.072                        | 1.134  |        |        |                              |        |        |        | 1.836                        | 1.818  | 1.429  | 1.506  |                              |        |        |        | 0.060                        | 0.394  | 0.115  | 0.117  |       |
| FLU B sgm 8                 |                              |        | 2.096  | 2.522  | 2.158                        | 2.179  |        |        |                              |        |        |        | 2.092                        | 2.511  | 2.163  | 2.220  |                              |        |        |        | 0.168                        | 1.369  | 1.229  | 1.183  |       |
| { Human parainfluenza 3     |                              |        |        |        | 0.182                        | 0.065  | 0.062  |        |                              |        |        |        |                              | 0.005  | 0.001  | 0.001  |                              |        |        |        |                              | 0.008  | 0.002  | 0.002  |       |
| { Human parainfluenza 3     |                              |        |        |        |                              |        |        |        |                              |        |        |        | 0.339                        | 0.166  | 0.061  | 0.058  |                              |        |        |        | 0.528                        | 0.223  | 0.074  | 0.073  |       |
| Human rubulavirus 2         |                              |        | 33.935 | 22.483 | 24.501                       | 24.784 |        |        |                              |        |        |        | 29.022                       | 20.565 | 22.711 | 22.760 |                              |        |        |        | 45.272                       | 27.768 | 28.338 | 28.961 |       |
| Respiratory syncytial virus |                              |        | 0.734  | 0.148  | 0.106                        | 0.124  |        |        |                              |        |        |        | 0.632                        | 0.142  | 0.099  | 0.114  |                              |        |        |        | 0.708                        | 0.166  | 0.116  | 0.130  |       |
|                             | ZeptoMetrix RP 2.1 Control 1 |        |        |        | ZeptoMetrix RP 2.1 Control 2 |        |        |        | ZeptoMetrix RP 2.1 Control 1 |        |        |        | ZeptoMetrix RP 2.1 Control 2 |        |        |        | ZeptoMetrix RP 2.1 Control 1 |        |        |        | ZeptoMetrix RP 2.1 Control 2 |        |        |        |       |

**Supplementary Result**  
**Figure 5: ZeptoMetrix RP**  
**2.1 sequence analysis**  
**with three different**  
**inStrain options**

Three different inStrain options were used to compare the classification of HQ paired-end short reads (min 100bp) from the ZeptoMetrix Respiratory Virus Control 1 and 2. The relative abundances of the identified viral signals are shown in a heat map generated in GraphPad Prism (v 10.0.3). The ZeptoMetrix taxa are shown in boxes and single lines under the heading 'ZeptoMetrix taxa'. The ZeptoMetrix control was sequenced using the same viral bait capture methods used in the Pilot 2 experiment. I.e. veSEQ, RVI-seq = inHouse method, II 3pl and II 8pl = Illumina 3 plex and 8 plex method. The three different inStrain options were: option 1 "with database mode, min genome coverage 1, min read average nucleotide identity (ani) of (0.92) and skip mm profiling", option 2 'no database mode, min genome coverage 0, min read ani of 0.9', option 3 (default) "no database mode, min genome coverage 0, min read ani 0.95".
