# Supplementary material for: Benchmarking and optimisation of bait-capture metagenomics for sequencing of respiratory viruses at scale
Source: Research Square preprint supplement (doi:10.21203/rs.3.rs-7872581/v1), 2025-11-07
Supplement: Supplementary file 12 [file c17b60c7b230401a3a684e37.pdf]

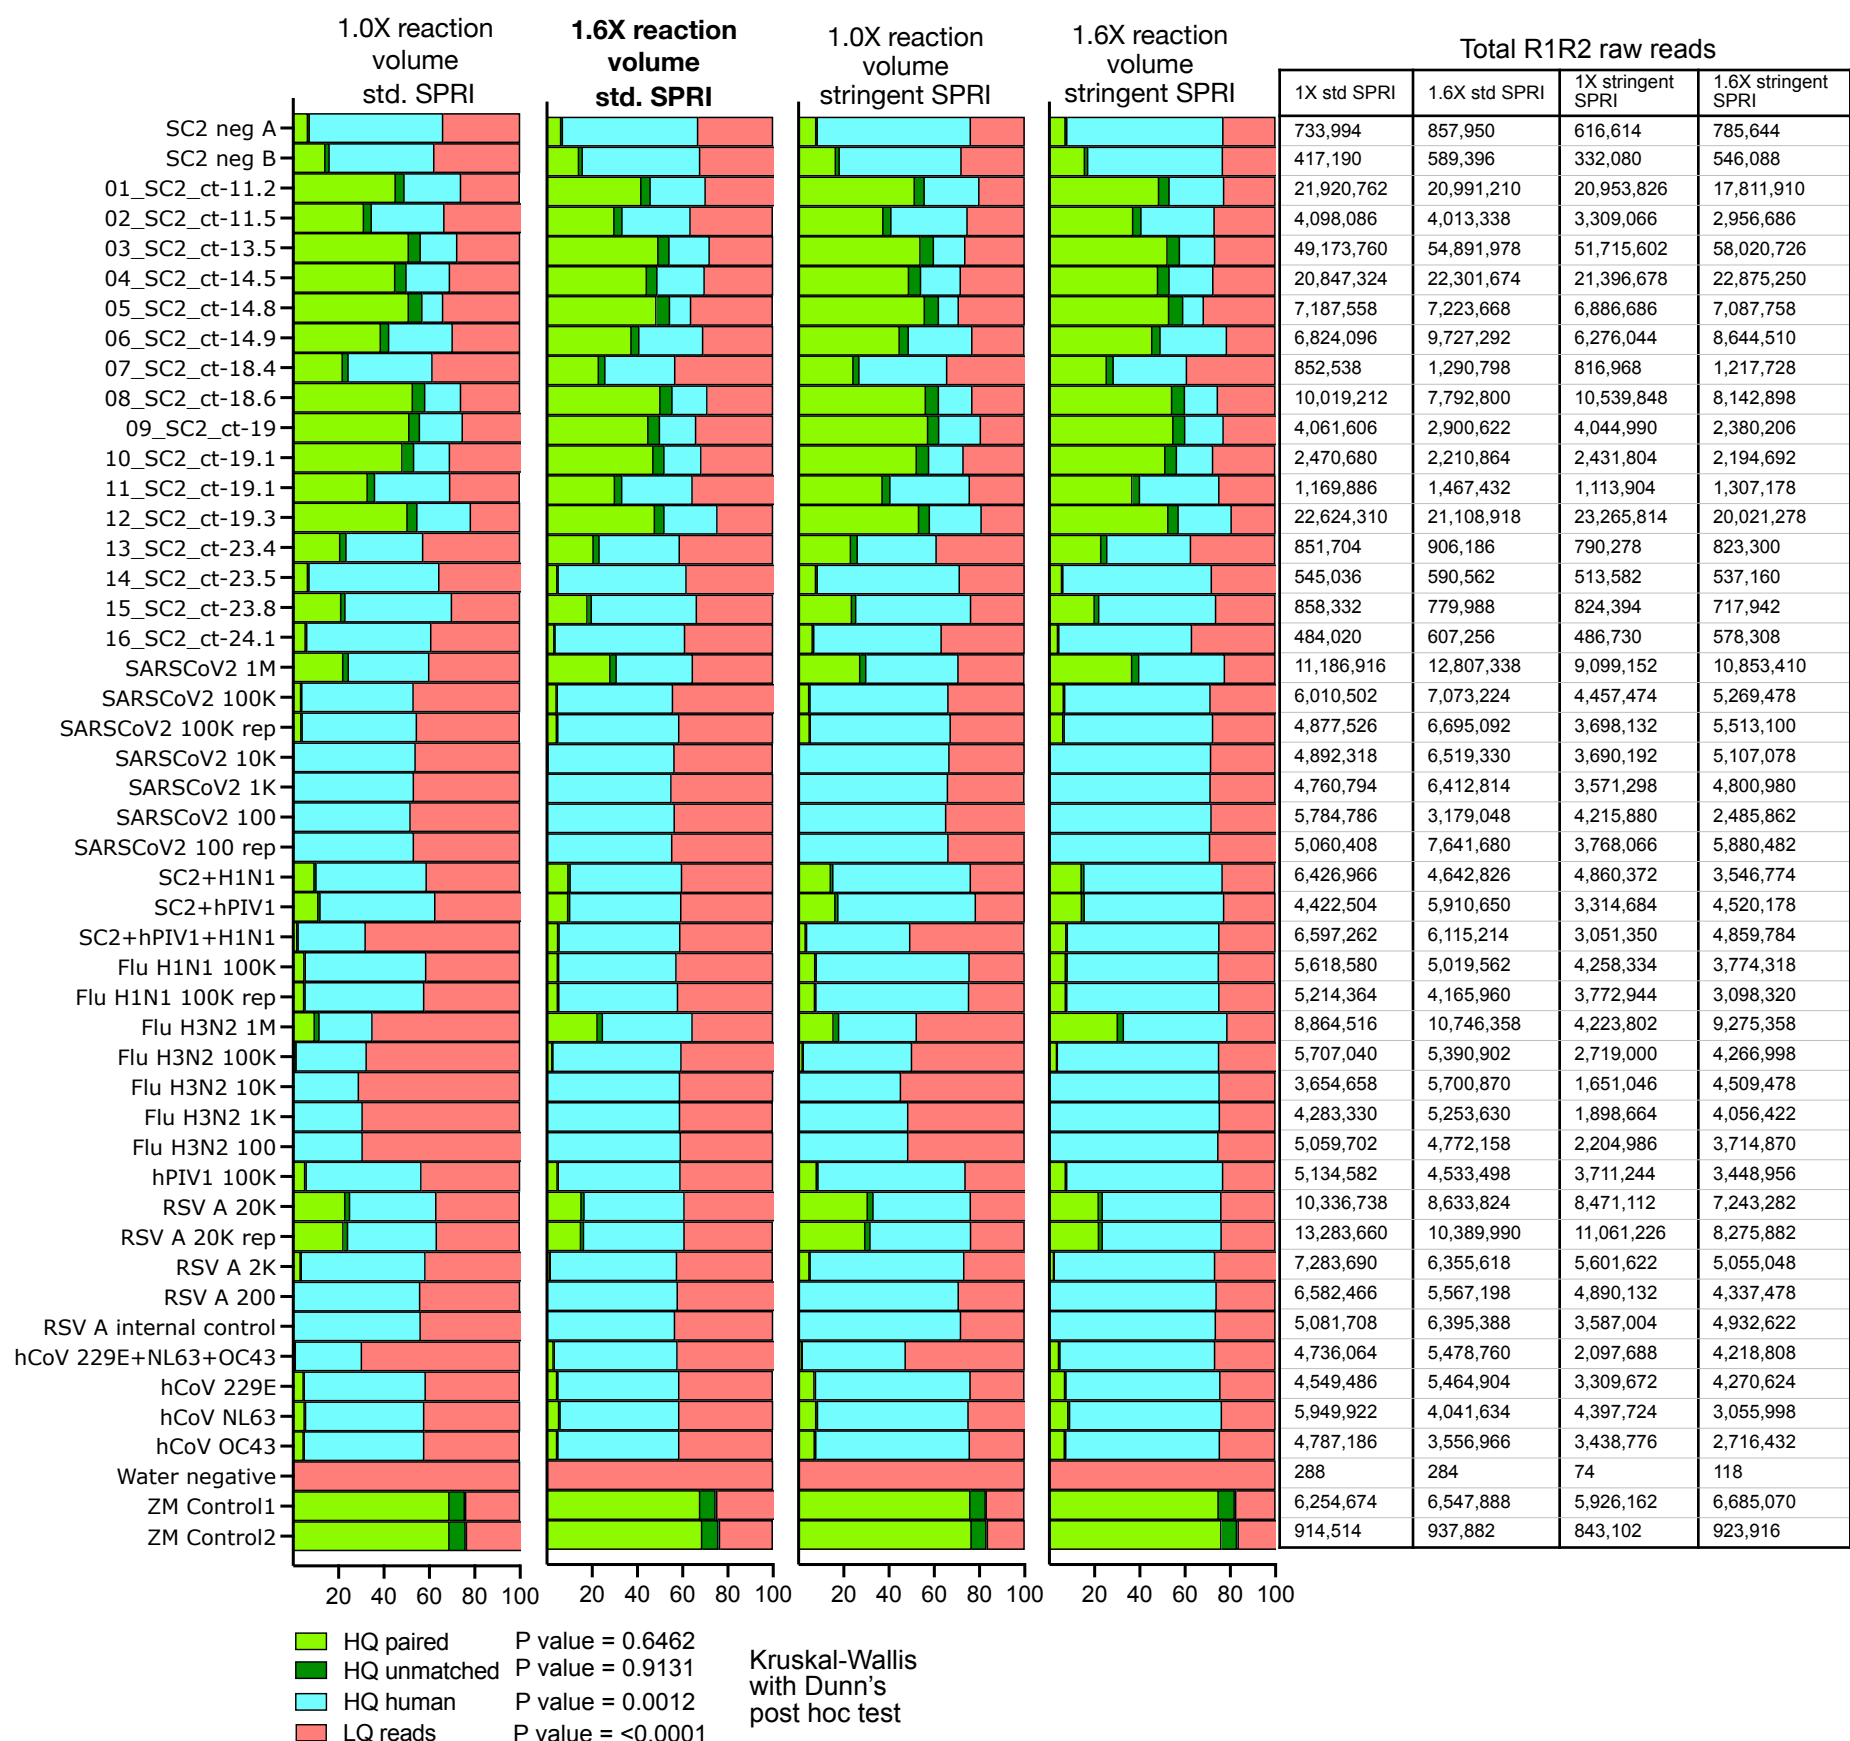

**Figure S7 - Relative frequencies of HQ paired end, unmatched reads, human reads and low-quality reads across the four different SPRI methods (Pilot 3)**

Kneaddata filtered reads with a minimum length of 70 bp were plotted for HQ paired end reads, HQ unmatched reads, human reads and LQ reads for all four laboratory SPRI methods. The number of total R1 and R2 raw reads is shown in the table. The Kruskal-Wallis test with Dunn's multiple comparisons was employed to identify statistical differences between the four distinct laboratory methods for each of the read groups. Abbreviations: SC2 = SARS-CoV-2; ct = PCR cycle threshold for the detection of SARS-CoV-2; rep = replicate sequencing; 1M = 1 million copy number sample; 100k, 10k, 1k, = 100,000, 10,000 and 1000 copy number sample, 100 = 100 copy number sample. SPRI stands for solid phase reversible immobilisation. Two different SPRI conditions were tested – standard and stringent. Two different cDNA synthesis reaction volumes were tested, at 1X and 1.6X scale.
