# Supplementary figures and images for: Benchmarking and optimisation of bait-capture metagenomics for sequencing of respiratory viruses at scale
Source: Research Square preprint supplement (doi:10.21203/rs.3.rs-7872581/v1), 2025-11-07

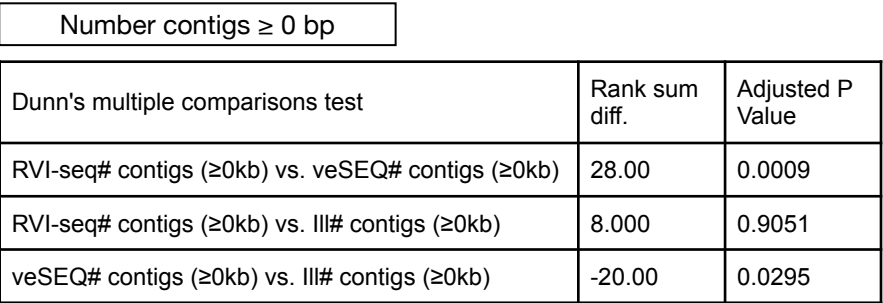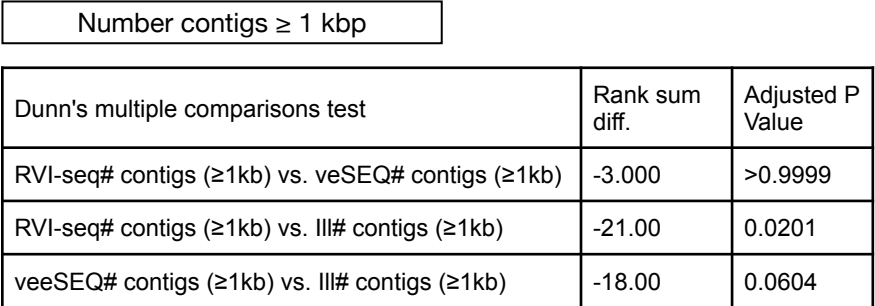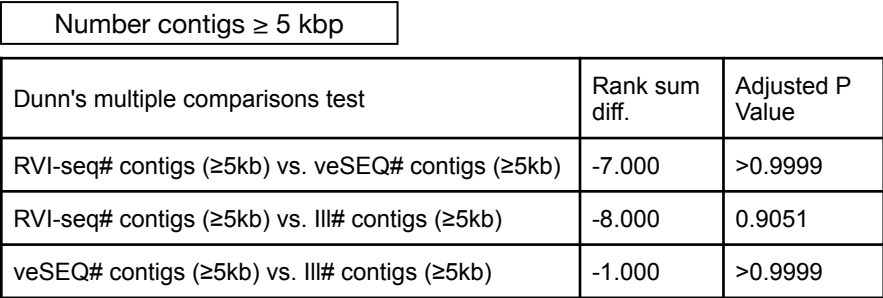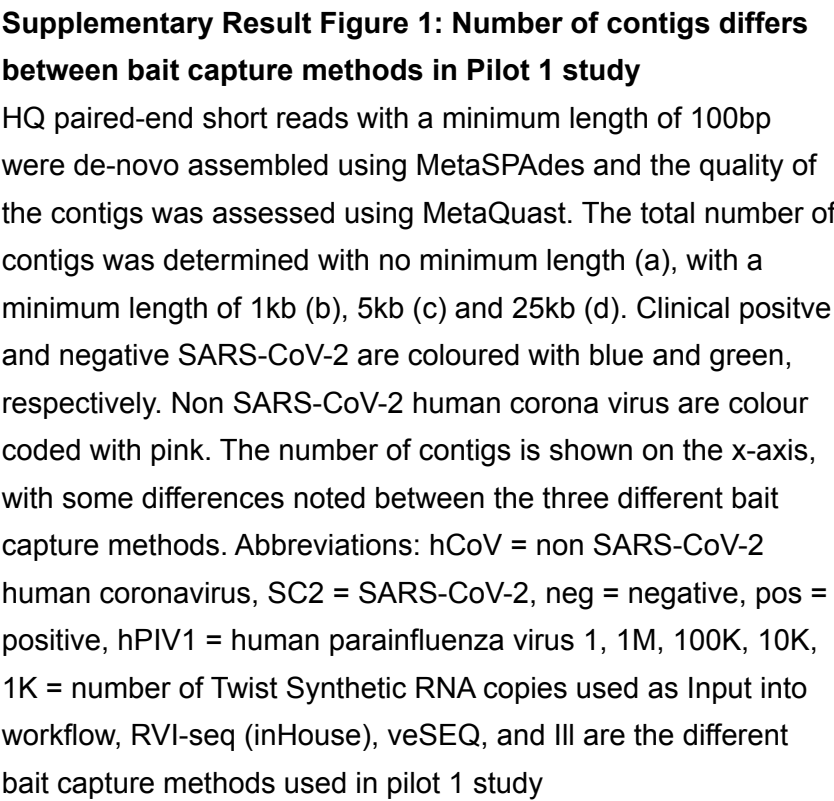

Supplement: Supplementary file 4 [file Supplementary Result Figure 1 --- de novo assemply contigs data .pdf › Additional File 7 Supplementary Results/Supplementary Result Figure 1 --- de novo assemply contigs data .pdf]

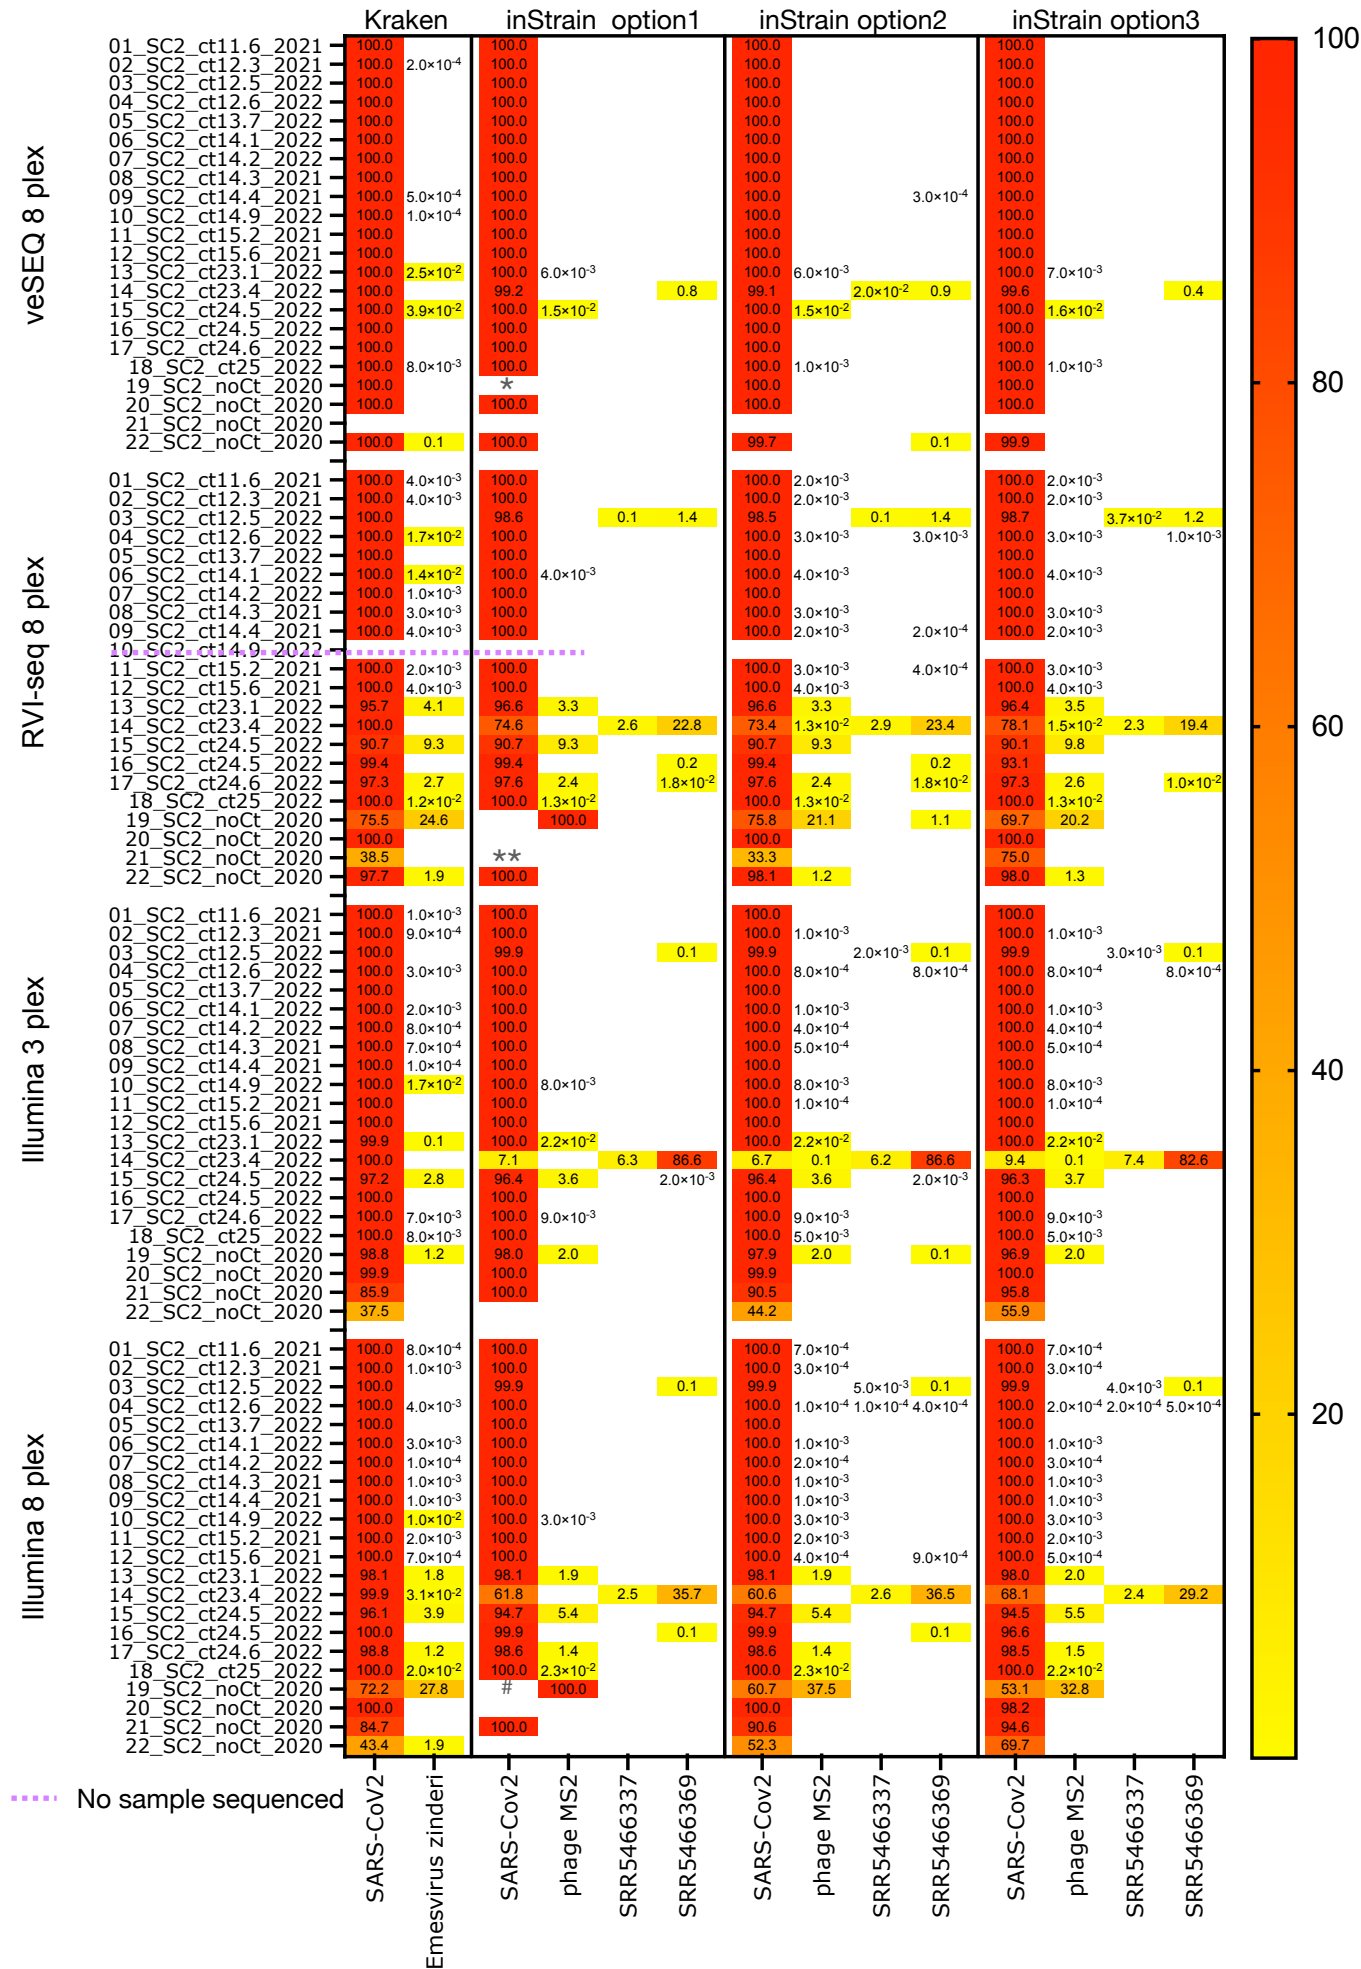

Supplement: Supplementary file 9 [file Supplementary Result Figure 6 --- inStrain and Kraken for SARS-CoV-2 positive.pdf › Additional File 7 Supplementary Results/Supplementary Result Figure 6 --- inStrain and Kraken for SARS-CoV-2 positive.pdf]

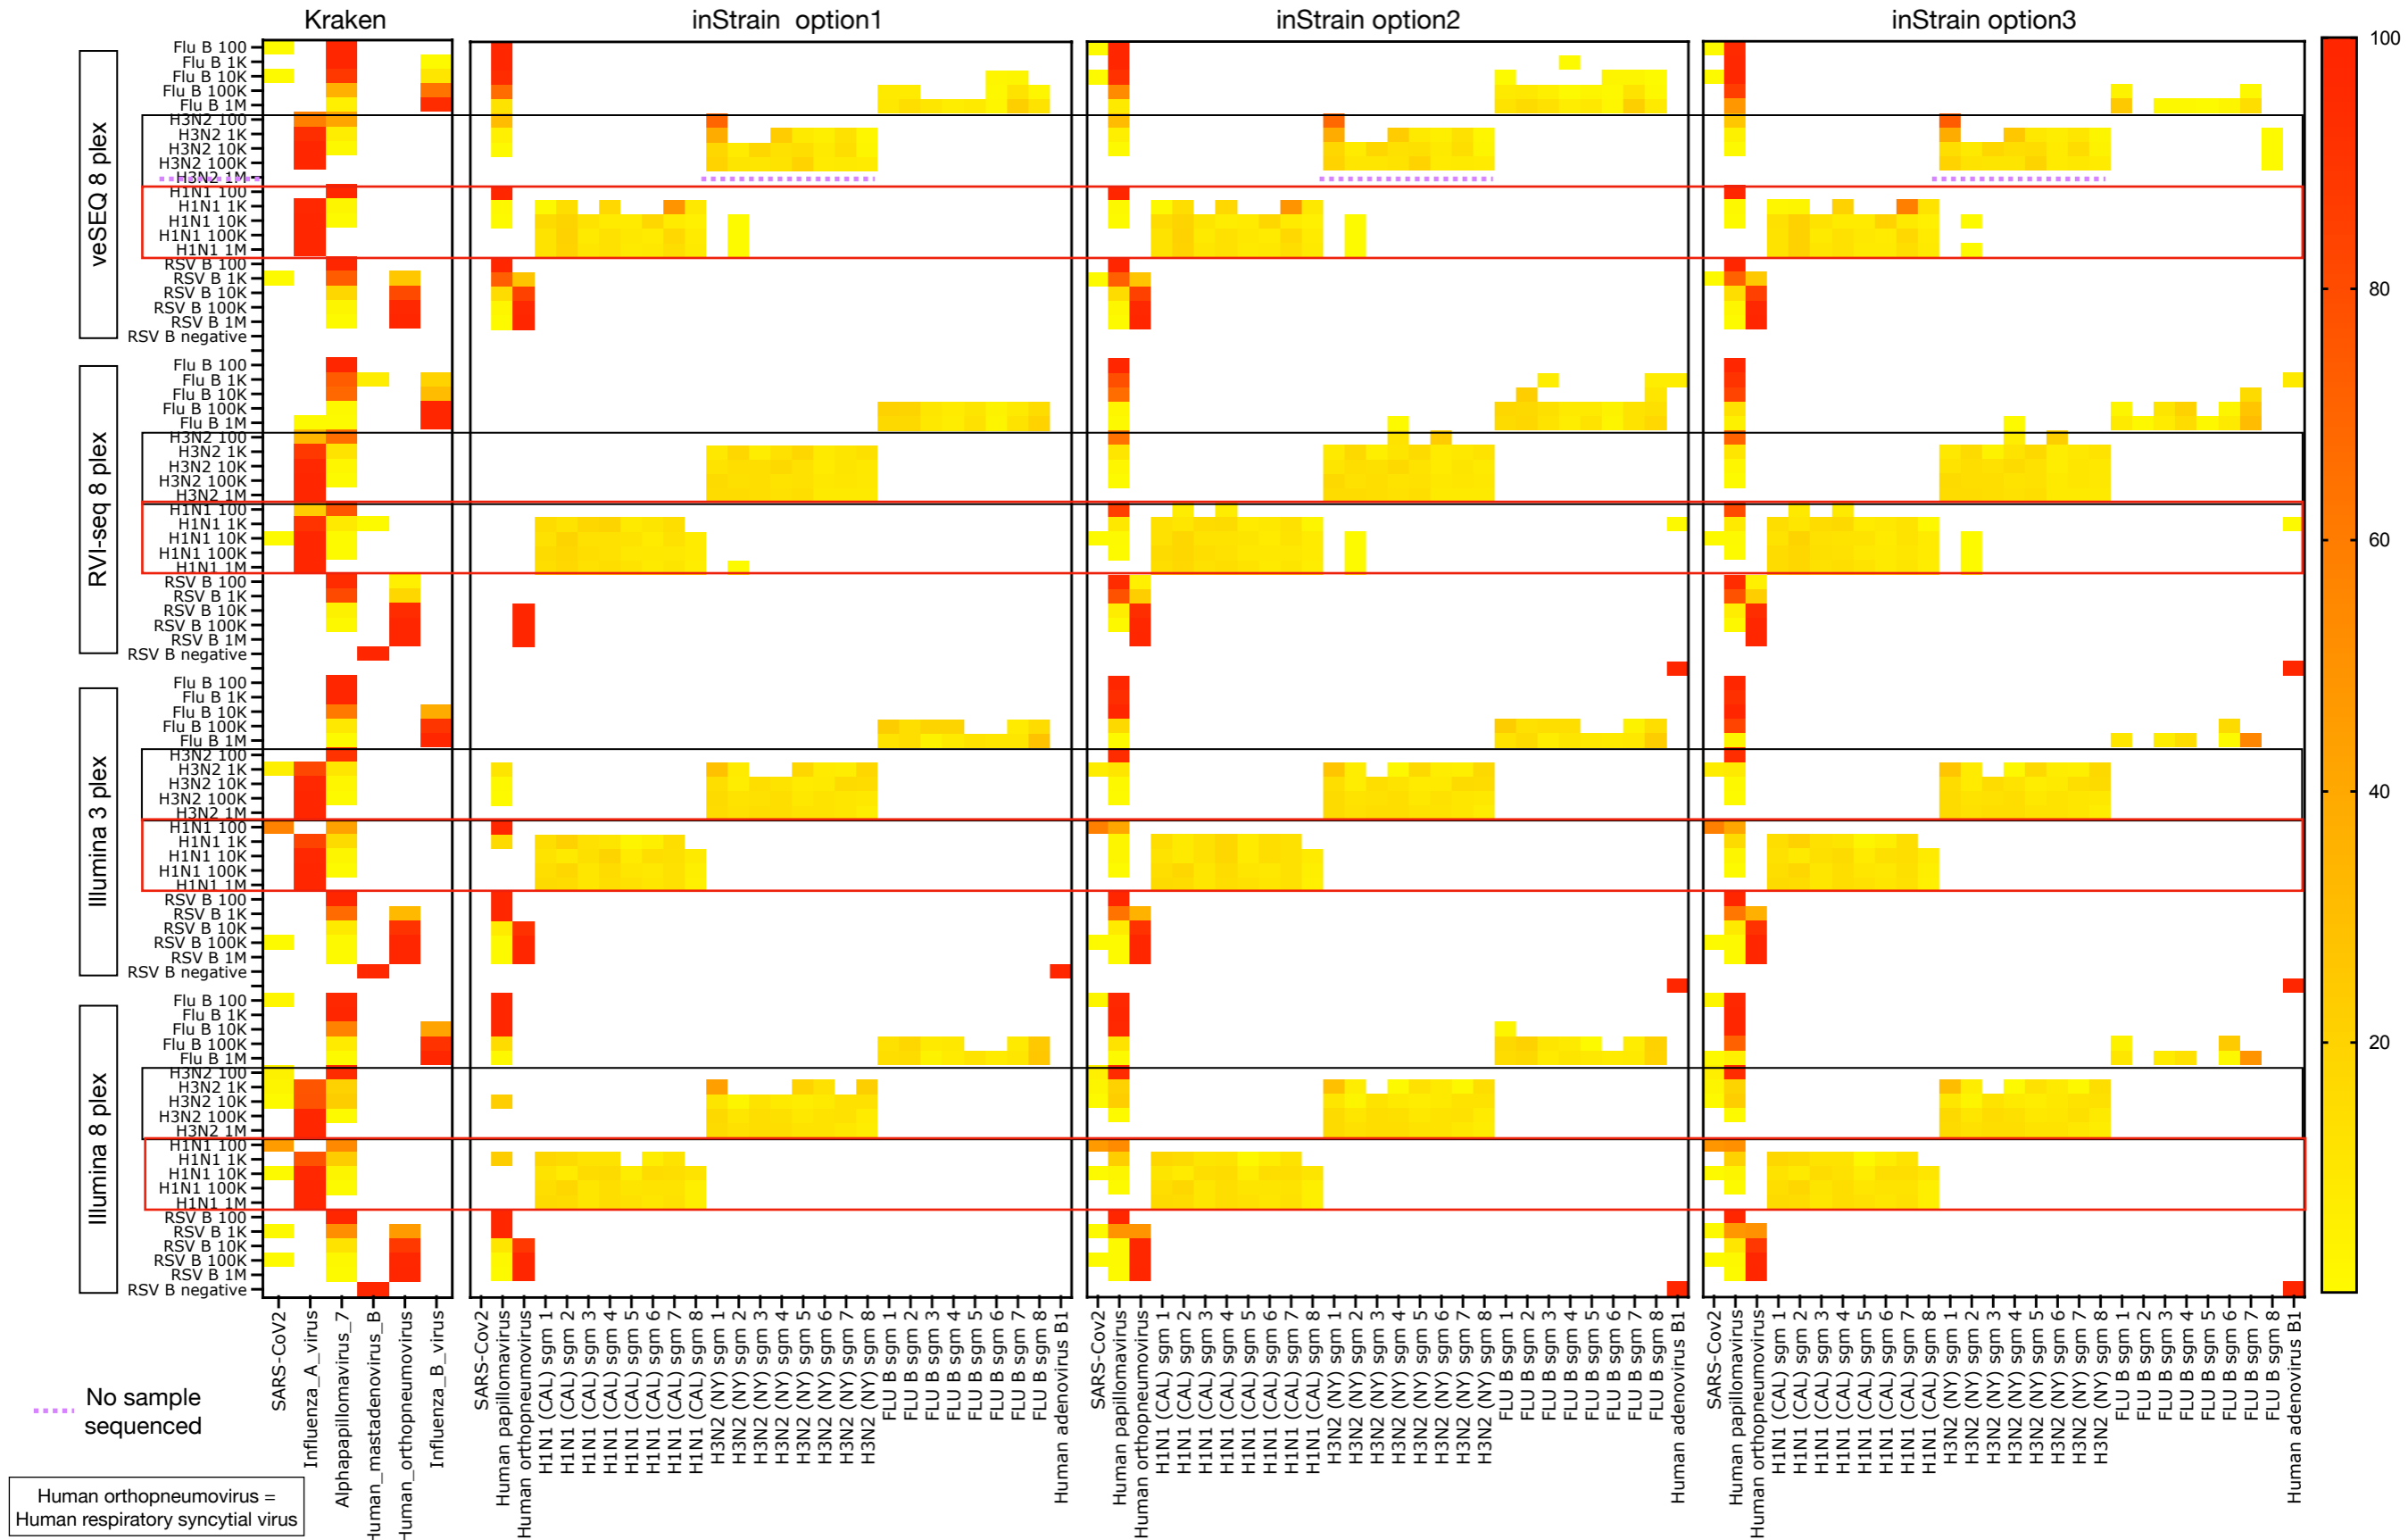

Supplement: Supplementary file 10 [file Supplementary Result Figure 7 --- inStrain and Kraken for NIBSC Flu.pdf › Additional File 7 Supplementary Results/Supplementary Result Figure 7 --- inStrain and Kraken for NIBSC Flu.pdf]
